# Supplementary material for: Frequency-Dependent Properties of the Hyperpolarization-Activated Cation Current, If, in Adult Mouse Heart Primary Pacemaker Myocytes
Source: MDPI journal article supplement (doi:10.3390/ijms23084299), 2022-04-13
Supplement: s1 [file s1]

## **Table of Contents for Supplement Section**

### **SI. Model Development and Validation**

- Table SI: Updated model equations for  $I_f$  (page S3)
- Figure S1: Experimental data for  $I_f$  superimposed on model output (page S4)
- Figure S2: Simulated I-V relationship for  $I_f$  (page S5)

### **SII. Mathematical Model Results for ISO-induced Changes in Mouse SAN Electrophysiological Activity and Underlying Currents**

- Table SII: Summary of the effects of graded changes in the conductance of  $I_f$  in mouse SAN model using the revised model (page S6)
- Figure S3: Illustration of effects of graded block of  $I_f$  (page S7)
- Table SIII: List of parameter changes used to model ISO effects (page S8)
- Table SIV: Summary of equations used for ISO-dependent effects on SAN (pages S9 to S11)
- Table SV: Summary of the dose-dependent effects of ISO on SAN pacemaker parameters (page S11)
- Table SVI: Effects of 0.1 to 10 nM ISO on SAN pacing and model parameters (page S12)
- Figure S4: Histograms of 10 nM ISO effects on SAN pacing (page S13)
- Figure S5: Simulated results of the effects of 0.5 nM ISO on the main current changes that underlie the pacemaker depolarization (page S14)
- Figure S6: Simulated results of the effects of 0.5 nM ISO on the main current changes that underlie the pacemaker depolarization (page S15)
- Figure S7: Histograms depicting dose-dependent ISO effects on the pacemaker activity biomarkers (page S16)
- Figure S8: Illustration of the changes in pacemaker cycle length and underlying ionic currents produced by either 0.5 or 10 nM ISO (page S17)

### **SIII. Selected Changes in Intracellular Ion Homeostasis Induced by ISO in Mouse SAN**

- Figure S9: Summary of changes in intracellular  $\text{Na}^+$  and  $\text{Ca}^{2+}$  homeostasis in response to 10 nM ISO (page S18)

## Supplement Section

### SI. Model Development and Validation

**Table SI: Updated model equation for Ir**

$$I_f = \sum_{i=1,2,4} (I_{fK_{hcni}} + I_{fNa_{hcni}}) \quad (1)$$

$$I_{fK_{hcni}} = g_{fK_{hcni}} \left( (1 - f_V) \times p_{i,f} + f_V \times p_{i,s} \right) \times (V - E_K) \quad (2)$$

$$I_{fNa_{hcni}} = g_{fNa_{hcni}} \left( (1 - f_V) \times p_{i,f} + f_V \times p_{i,s} \right) \times (V - E_{Na}) \quad (3)$$

$$p_{i,f\infty} = p_{i,s\infty} = \frac{1}{1 + e^{(V+100.27-S_{if\_iso})/9.73}} \quad (4)$$

$$\tau_{p_{i,f}} = \frac{14.7}{e^{(V-0.77)/21.12} + e^{-(V+190.15)/21.88}} \quad (5)$$

$$\tau_{p_{i,s}} = \frac{66.43}{e^{(V-7.59)/18.09} + e^{-(V+198.66)/22.71}} \quad (6)$$

$$\frac{dp_{i,f}}{dt} = \frac{p_{i,f\infty} - p_{i,f}}{\tau_{p_{i,f}}} \quad (7)$$

$$\frac{dp_{i,s}}{dt} = \frac{p_{i,s\infty} - p_{i,s}}{\tau_{p_{i,s}}} \quad (8)$$

$$f_v = \frac{\varphi_v}{1 + \varphi_v} \quad (9)$$

$$\varphi_v = 1 \quad (10)$$

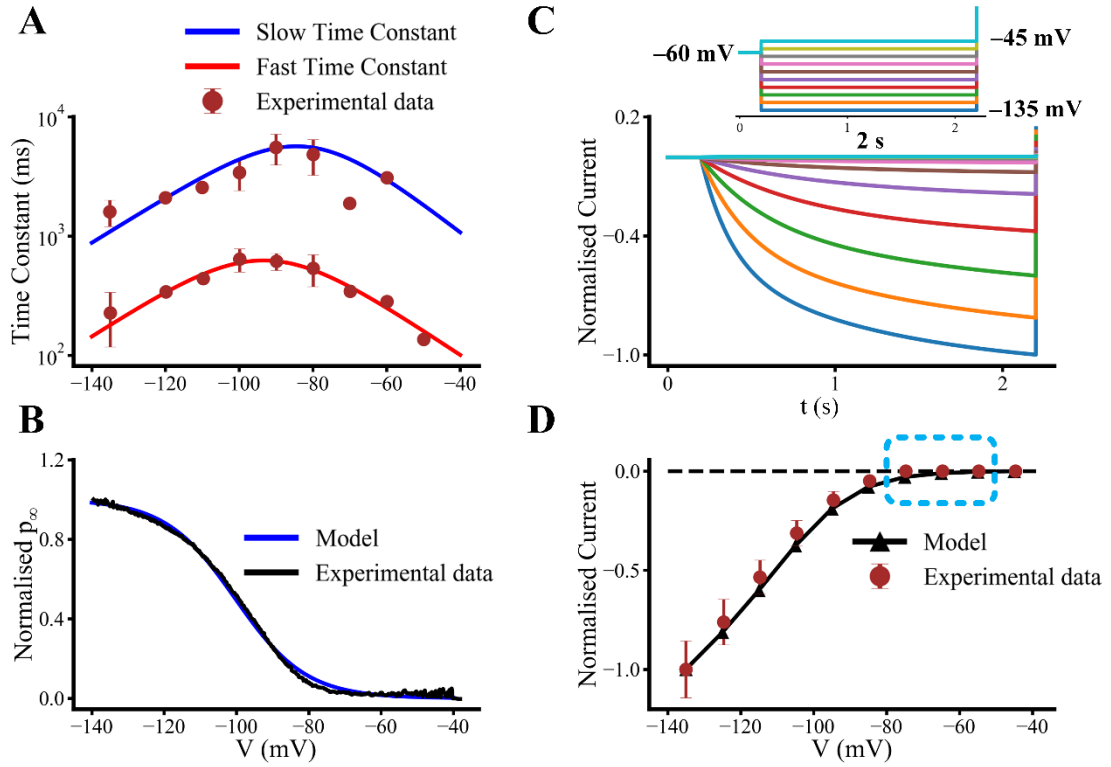

**Figure S1.** Simulated and experimental data of channel kinetics and I-V relationship. (A) Voltage-dependence of slow and fast time constants of  $I_f$  activation of  $I_f$ . (B) The steady-state activation curve of model (blue) and experimental data (black). (C) Time course of  $I_f$  traces during voltage-clamp protocol as shown in inset. (D) Comparison of simulated I-V relationship (black) with experimental data.

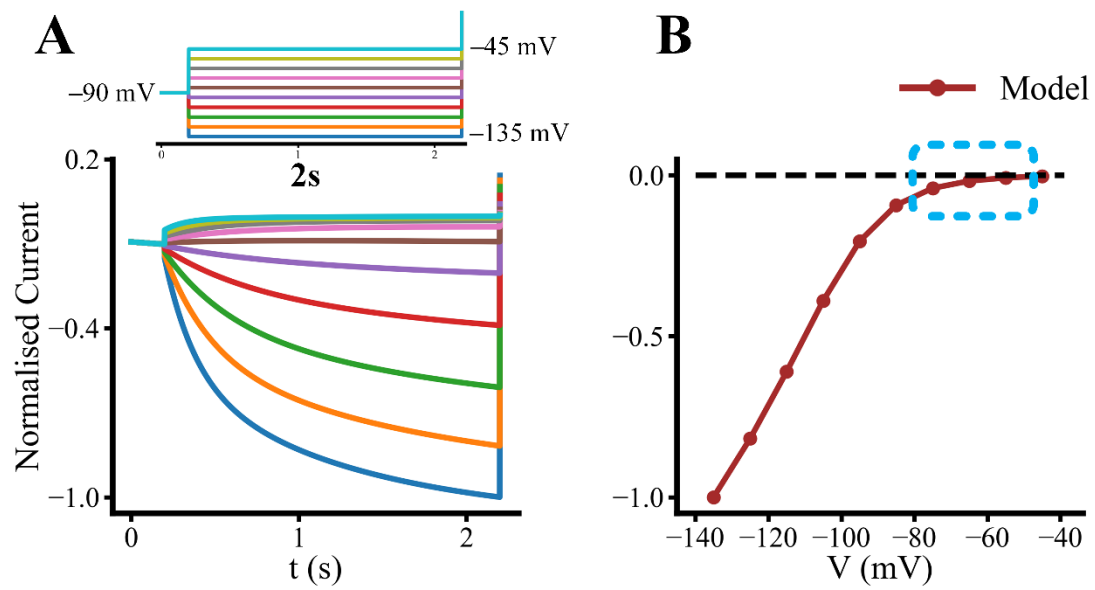

**Figure S2.** Simulated  $I_f$  records in response to the voltage-clamp protocol shown at the top of Panel (A). Panel B consists of isochronal (2 sec) I-V relationship. The range of membrane potentials that correlate with the pacemaker or diastolic depolarization is highlighted by the green rectangle.

**SII. Mathematical Model Results for ISO-induced Changes in Mouse SAN Electrophysiological Activity and Underlying Currents**

**Table SII.** Summary of the effects of graded changes in the conductance of  $I_f$  in the updated mouse SAN model.

| Model        |     | MDP<br>(mV) | OS<br>(mV) | $dV/dt_{\max}$<br>(V/s) | APD <sub>50</sub><br>(ms) | APD <sub>90</sub><br>(ms) | Pacing<br>Frequency<br>(HZ) | DDR<br>(V/s) | TOP<br>(mV) |
|--------------|-----|-------------|------------|-------------------------|---------------------------|---------------------------|-----------------------------|--------------|-------------|
| CTR          |     | -60.89      | 13.41      | 4.78                    | 30.02                     | 53.29                     | 6.00                        | 0.32         | -39.30      |
| $g_f \times$ | 0   | -61.95      | 14.61      | 5.22                    | 29.77                     | 53.12                     | 5.89                        | 0.27         | -44.19      |
|              | 0.2 | -61.72      | 14.35      | 5.13                    | 29.82                     | 53.16                     | 5.92                        | 0.28         | -43.62      |
|              | 0.4 | -61.51      | 14.11      | 5.04                    | 29.87                     | 53.19                     | 5.94                        | 0.28         | -42.95      |
|              | 0.6 | -61.30      | 13.87      | 4.95                    | 29.92                     | 53.23                     | 5.96                        | 0.29         | -42.07      |
|              | 0.8 | -61.09      | 13.64      | 4.87                    | 29.97                     | 53.26                     | 5.98                        | 0.31         | -40.73      |

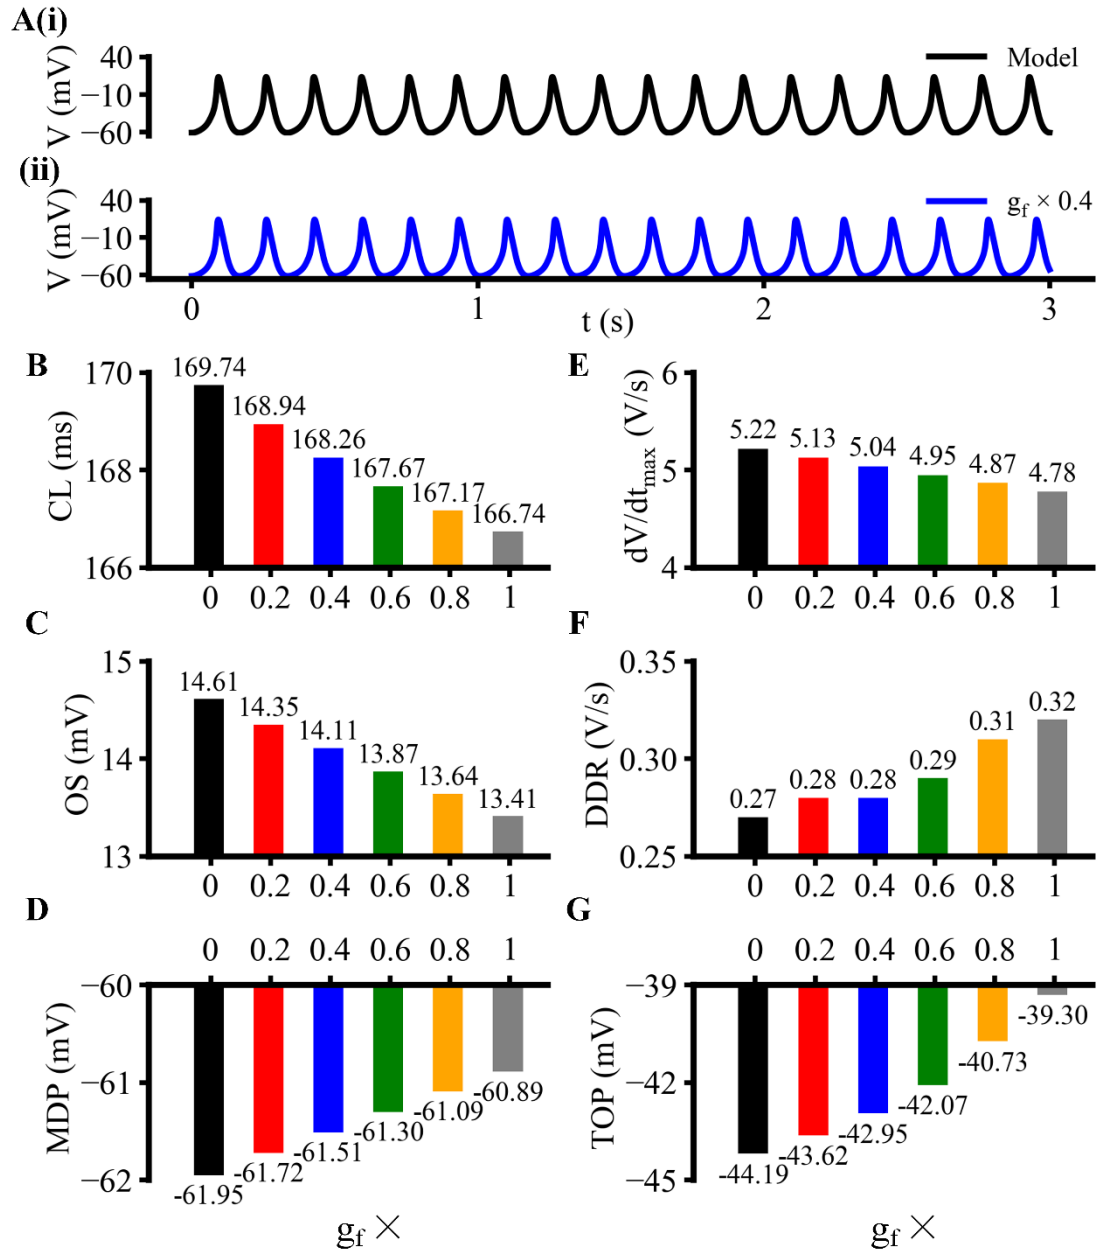

**Figure S3.** Illustration of effects of graded block of  $I_f$  (scale from 0 (control) to 1 (complete block)) on the characteristics of pacemaking AP waveforms. (A(i)-A(ii)) Illustrative trains of APs for control (black) and  $g_{Kf} \times 0.4$  (blue). (B) Cycle length (CL). (C) Overshoot potential (OS). (D) Maximal diastolic potential (MDP). (E) Maximal upstroke velocity ( $dV/dt_{max}$ ). (F) Diastolic depolarization rate (DDR). (G) Take-off potential (TOP).

**Table SIII.** List of parameter changes used to model ISO (10 nM) effects

| Ion channels                  |             | Maximal values of changes                                                                               |
|-------------------------------|-------------|---------------------------------------------------------------------------------------------------------|
| $I_{CaL}$                     |             | maximum channel conductance increased by 1.9-fold                                                       |
|                               |             | steady state of activation and inactivation curves shifted by +10mV                                     |
| $I_{CaT}$                     |             | maximum channel conductance increased by 2-fold                                                         |
| $I_f$                         |             | steady state of fast and slow activation curves shifted by -13.6mV                                      |
| $I_{Kr}$                      |             | maximum conductance increased by 2.87-fold.                                                             |
|                               |             | steady state of fast and slow activation curves shifted by +15mV                                        |
| $I_{Ks}$                      |             | maximum conductance increased by 2.87-fold                                                              |
| $I_{st}$                      |             | maximum conductance increased by 2-fold                                                                 |
| $Ca^{2+}$ handling in the SR. | $k_{oSRCa}$ | $k_{oSRCa}$ is doubled ( $k_{oSRCa}$ : $Ca^{2+}$ -dependent RyR rate constant not limited by diffusion) |
|                               | $K_{mf}$    | $K_{mf}$ is reduced by 50% ( $K_{mf}$ : Forward-mode $Ca^{2+}$ affinity of the SERCA pump)              |

**$k_{oSRCa}$ :**  $Ca^{2+}$ -dependent RyR rate constant not limited by diffusion, which can influence the parameters: “Resting (R)” (Fraction of reactivated (closed) RyR channels) and “Resting inactivated (RI)” (Fraction of RyR inactivated channels).

**$K_{mf}$ :** Forward-mode  $[Ca^{2+}]$  affinity of the SERCA pump, which can influence the parameter  $j_{up}$  ( $Ca^{2+}$  uptake flux from the myoplasm to the NSR).



**Table SIV:** Summary of equations used for ISO-dependent effects on SAN

$$iso = [Iso] \text{ in } nM \quad (11)$$

(i)  $I_{CaL}$

$$f_{CaL\_iso} = 0.9 \times \frac{iso}{1.5 \times 10^{-2} + iso} \quad (12)$$

$$I_{CaL,1.2} = (1 + f_{CaL\_iso})g_{CaL,1.2}d_{L,1.2}f_{L,1.2}f_{Ca}(V - E_{CaL\_SAN}) \quad (13)$$

$$I_{CaL,1.3} = (1 + f_{CaL\_iso})g_{CaL,1.3}d_{L,1.3}f_{L,1.3}f_{Ca}(V - E_{CaL\_SAN}) \quad (14)$$

$$S_{CaL\_iso} = 10.0 \times \frac{iso}{1.5 \times 10^{-2} + iso} \quad (15)$$

$$d_{L,1.2,\infty} = \frac{1}{1 + e^{-(V+3.0+S_{CaL\_iso})/5}} \quad (16)$$

$$f_{L,1.2,\infty} = \frac{1}{1 + e^{(V+36.0+S_{CaL\_iso})/4.6}} \quad (17)$$

$$d_{L,1.3,\infty} = \frac{1}{1 + e^{-(V+13.5+S_{CaL\_iso})/6}} \quad (18)$$

$$f_{L,1.3,\infty} = \frac{1}{1 + e^{(V+35.0+S_{CaL\_iso})/7.3}} \quad (19)$$

(ii)  $I_{CaT}$

$$f_{CaT\_iso} = 1.0 \times \frac{iso}{1.5 \times 10^{-3} + iso} \quad (20)$$

$$I_{CaT} = (1 + f_{CaT\_iso})g_{CaT}d_Tf_T(V - E_{CaT}) \quad (21)$$

(iii)  $I_f$  (22)

$$S_{if\_iso} = 13.6 \times \frac{iso^{0.392}}{(1.35 \times 10^{-2})^{0.392} + iso^{0.392}} \quad (23)$$

$$p_{if,i,f\infty} = p_{if,i,s\infty} = \frac{1}{1 + e^{(V+100.27-S_{if\_iso})/9.73}} \quad (i = 1,2,4) \quad (24)$$

(iv)  $I_{Kr}$

$$f_{K\_iso} = 1.87 \times \frac{iso}{1.9 \times 10^{-3} + iso} \quad (25)$$

$$I_{Kr} = (1 + f_{K\_iso})g_{Kr}p_ap_i(V - E_K) \quad (26)$$

$$S_{Kr\_iso} = 15.0 \times \frac{iso}{7.5 \times 10^{-3} + iso} \quad (27)$$

$$p_{Kr,a,f\infty} = p_{Kr,a,s\infty} = \frac{1}{1 + e^{-(V+21.17+S_{Kr\_iso})/9.76}} \quad (28)$$

(v)  $I_{Ks}$

$$I_{Ks} = (1 + f_{K\_iso})g_{Ks}p_ap_i(V - E_{Ks}) \quad (29)$$

(vi)  $I_{st}$

$$f_{st\_iso} = 1.0 \times \frac{iso}{3.3 \times 10^{-2} + iso} \quad (30)$$

$$I_{st} = (1 + f_{st\_iso})g_{st}d_{st}f_{st}(V - E_{ist\_SAN}) \quad (31)$$

(vii) Intracellular  $Ca^{2+}$  handling

$$f_{RyR\_iso} = \frac{1}{1 + e^{-2.55 \times (\log(iso) + 2.5)}} \quad (32)$$

$$k_{oSRCa} = k_{oCa\_SAN} \times (1 + f_{RyR\_iso})/k_{CaSR} \quad (33)$$

$$\begin{aligned} \frac{dO}{dt} = & (k_{oSRCa} \times [Ca^{2+}]_{sub}^2 \times R \\ & - k_{om} \times O) \\ & - (k_{iSRCa} \times [Ca^{2+}]_{sub} \times O \\ & - k_{im} \times I) \end{aligned} \quad (34)$$

$$\begin{aligned} \frac{dI}{dt} = & (k_{iSRCa} \times [Ca^{2+}]_{sub} \times O - k_{im} \times I) \\ & - (k_{om} \times I \\ & - k_{oSRCa} \times [Ca^{2+}]_{sub}^2 \times RI) \end{aligned} \quad (35)$$

$$\begin{aligned} \frac{dR}{dt} = & (k_{im} \times RI - k_{iSRCa} \times [Ca^{2+}]_{sub} \times R) \\ & - (k_{oSRCa} \times [Ca^{2+}]_{sub}^2 \times RI \\ & - k_{om} \times O) \end{aligned} \quad (36)$$

$$\frac{dRI}{dt} = (k_{om} \times I - k_{oSRCa} \times [Ca^{2+}]_{sub}^2 \times RI) - (k_{im} \times RI - k_{iSRCa} \times [Ca^{2+}]_{sub} \times R) \quad (37)$$

$$f_{PLB\_iso} = \frac{1}{1 + e^{-3.0 \times (\log(iso) + 2.2)}} \quad (38)$$

$$K_{mf} = K_{mf\_SAN} \times (1.0 - 0.5 \times f_{PLB\_iso}) \quad (39)$$

$$j_{up} = P_{up} \times \frac{([Ca^{2+}]_i / K_{mf})^{n_{up}} - ([Ca^{2+}]_{up} / K_{mr})^{n_{up}}}{1 + ([Ca^{2+}]_i / K_{mf})^{n_{up}} - ([Ca^{2+}]_{up} / K_{mr})^{n_{up}}} \quad (40)$$

**Table SV.** Summary of the effects of ISO (10 nM) on SAN pacemaker parameters

| Model           |            | MDP (mV) | OS (mV) | dV/dt <sub>max</sub> (V/s) | APD <sub>50</sub> (ms) | APD <sub>90</sub> (ms) | CL (ms) | DDR (V/s) | TOP (mV) |
|-----------------|------------|----------|---------|----------------------------|------------------------|------------------------|---------|-----------|----------|
| Original (HZ_1) | CTR        | -60.08   | 12.32   | 4.35                       | 30.44                  | 53.34                  | 164.85  | 0.36      | -35.31   |
|                 | ISO (10nM) | -69.96   | 17.17   | 11.67                      | 22.13                  | 34.58                  | 111.41  | 0.44      | -45.73   |
| Updated (HZ_2)  | CTR        | -60.89   | 13.41   | 4.78                       | 30.02                  | 53.29                  | 166.74  | 0.32      | -39.30   |
|                 | ISO (10nM) | -71.31   | 19.14   | 14.60                      | 21.68                  | 34.65                  | 127.88  | 0.32      | -49.34   |

**Table SVI.** Effects of 0.1 to 10 nM ISO on SAN pacing and model parameters.

| Model       |     | MDP<br>(mV) | OS<br>(mV) | dV/dt <sub>max</sub><br>(V/s) | APD <sub>50</sub><br>(ms) | APD <sub>90</sub><br>(ms) | Pacing<br>Frequency<br>(HZ) | DDR<br>(V/s) | TOP<br>(mV) |
|-------------|-----|-------------|------------|-------------------------------|---------------------------|---------------------------|-----------------------------|--------------|-------------|
| CTR         |     | -60.89      | 13.41      | 4.78                          | 30.02                     | 53.29                     | 6.00                        | 0.32         | -39.30      |
| ISO<br>(nM) | 0.1 | -62.13      | 14.50      | 5.42                          | 28.78                     | 50.21                     | 6.41                        | 0.31         | -43.28      |
|             | 0.5 | -65.53      | 17.03      | 7.49                          | 26.40                     | 44.21                     | 7.14                        | 0.32         | -46.21      |
|             | 1   | -67.52      | 18.16      | 9.26                          | 25.09                     | 41.10                     | 7.44                        | 0.32         | -47.36      |
|             | 2   | -69.27      | 18.91      | 11.35                         | 23.72                     | 38.28                     | 7.63                        | 0.32         | -48.28      |
|             | 10  | -71.31      | 19.14      | 14.60                         | 21.68                     | 34.65                     | 7.81                        | 0.32         | -49.34      |

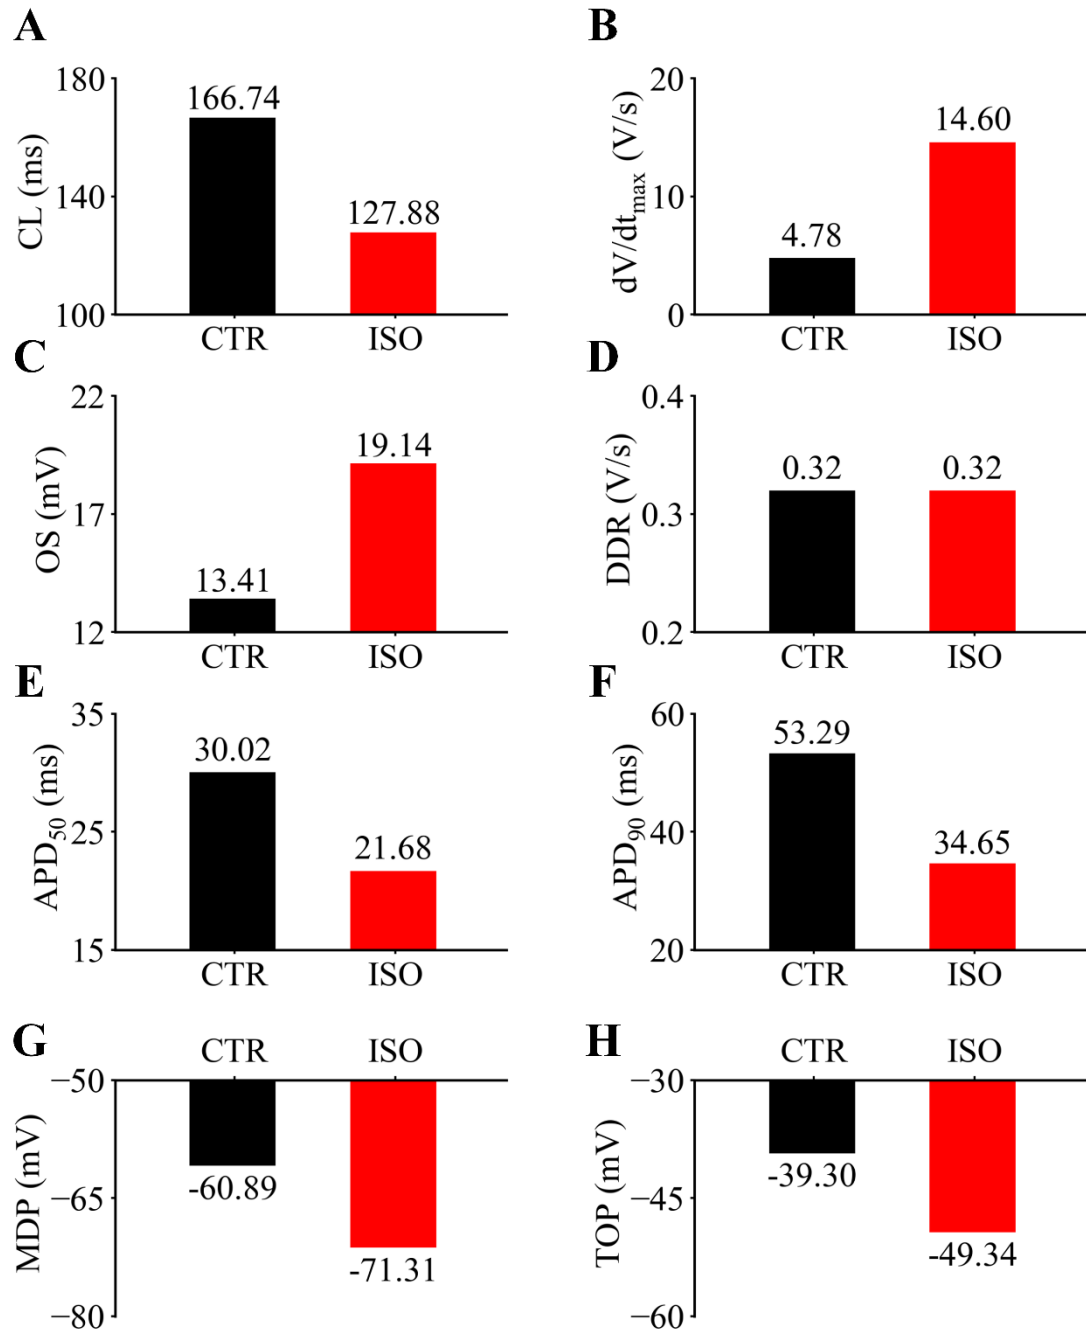

**Figure S4.** Effects of ISO (10 nM) on characteristics/biomarkers of pacemaker APs. (A) Cycle length (CL). (B) Maximum rate of phase 0 of the action potential ( $dV/dt_{\max}$ ). (C) Overshoot of AP (OS). (D) Maximum rate of the diastolic depolarization (DDR). (E) APD<sub>50</sub>. (F) APD<sub>90</sub>. (G) Maximum diastolic potential (MDP). (H) Threshold for firing a take-off potential (TOP).

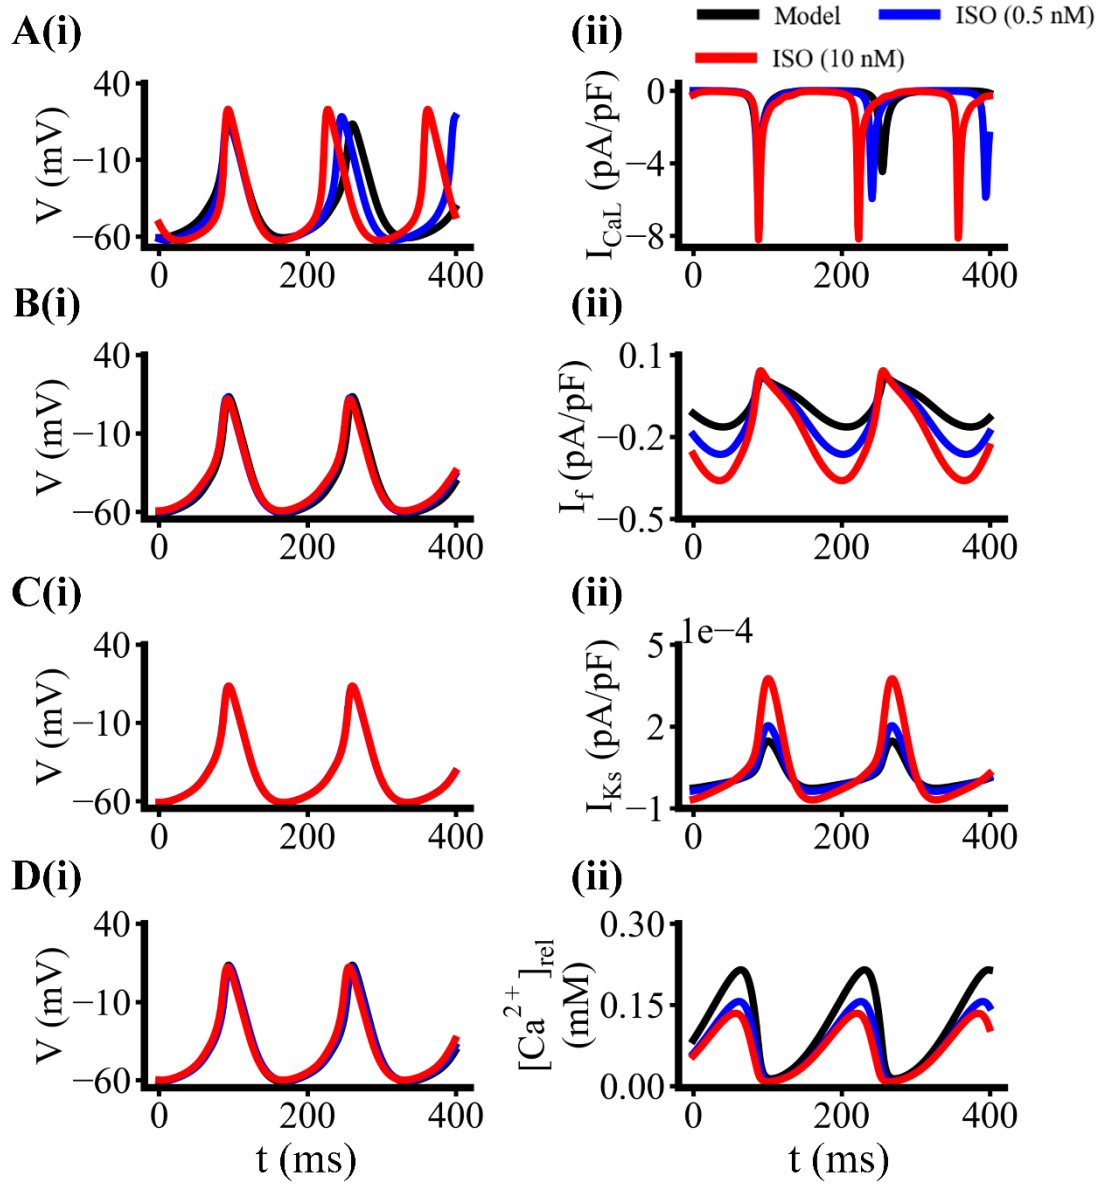

**Figure S5.** Simulated waveforms of spontaneous pacemaker potential (APs) (A(i)-D(i)) and underlying ion channel current or  $[Ca^{2+}]_i$  in control condition and following the addition of ISO (0.5 or 10 nM). (A(ii) – D(ii)) when an individual ISO action of the designated ion channel/ $Ca^{2+}$  handling target is considered in the presence of two different ISO concentrations (control: black; 0.5 nM: blue; 10 nM: red). A: ISO action on  $I_{CaL}$  alone. B: ISO action on  $I_f$  alone is considered. C: ISO action on  $I_{Ks}$  alone is considered. D: ISO action on SR- $Ca^{2+}$  release alone is considered.

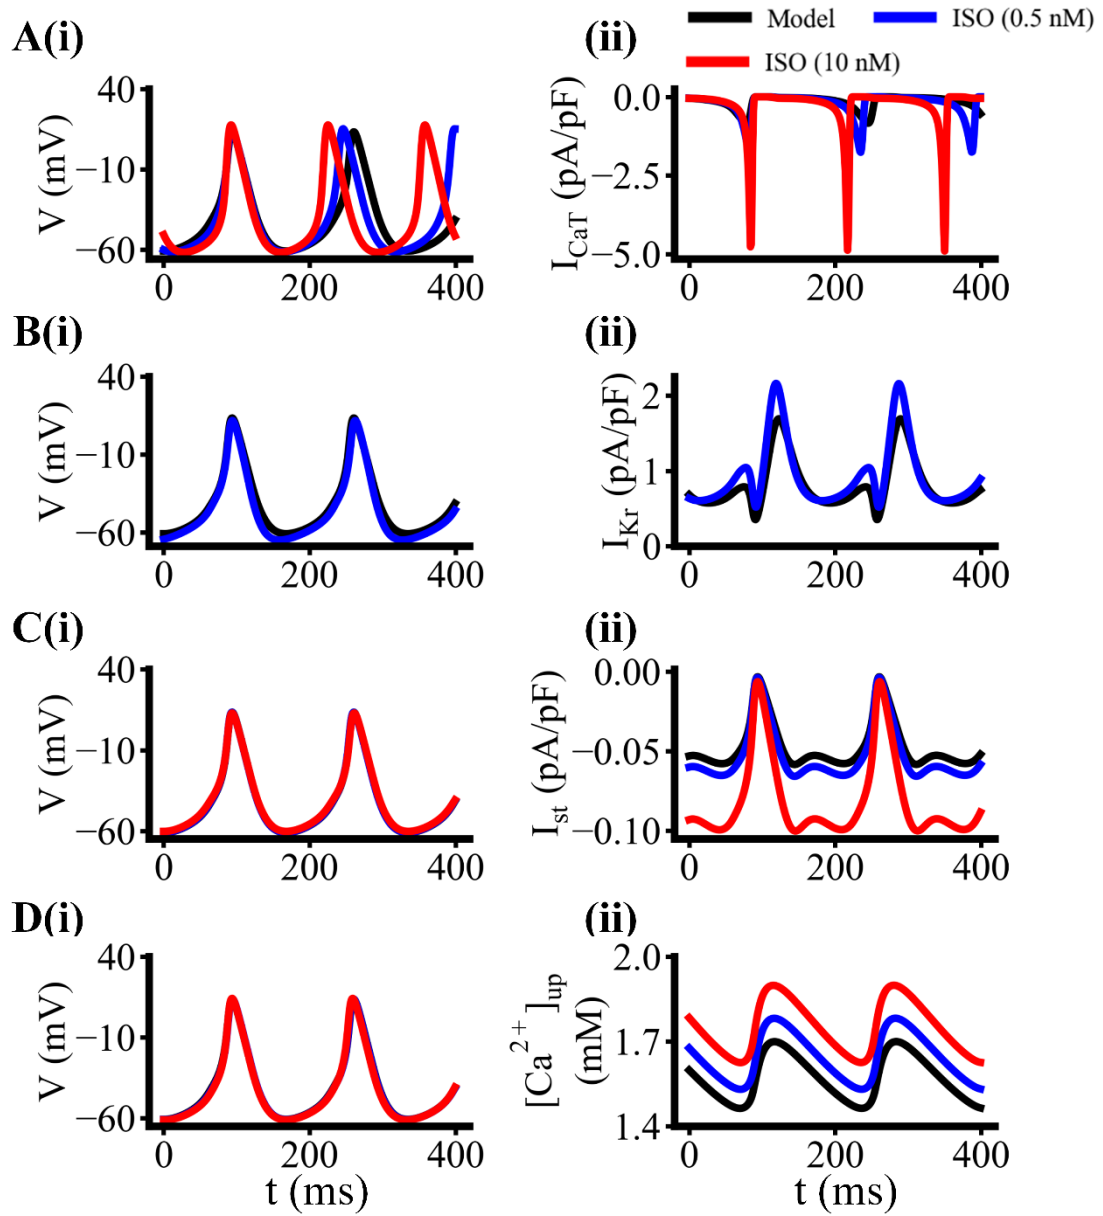

**Figure S6.** Simulated waveforms of spontaneous pacemaker potentials (APs) in control and following the addition of ISO (0.5 or 10 nM). (A(i)-D(ii)) and underlying ion channel current or  $[Ca^{2+}]_i$  (A(ii) – D(ii)) when an individual ISO action of the designated ion channel/ $Ca^{2+}$  handling target is considered in the presence of two different ISO concentrations (control: black; 0.5 nM: blue; 10 nM: red). A: ISO action on  $I_{CaT}$  alone. B: ISO action on  $I_{Kr}$  alone is considered. C: ISO action on  $I_{st}$  alone is considered. D: ISO action on SR- $Ca^{2+}$  uptake alone is considered.

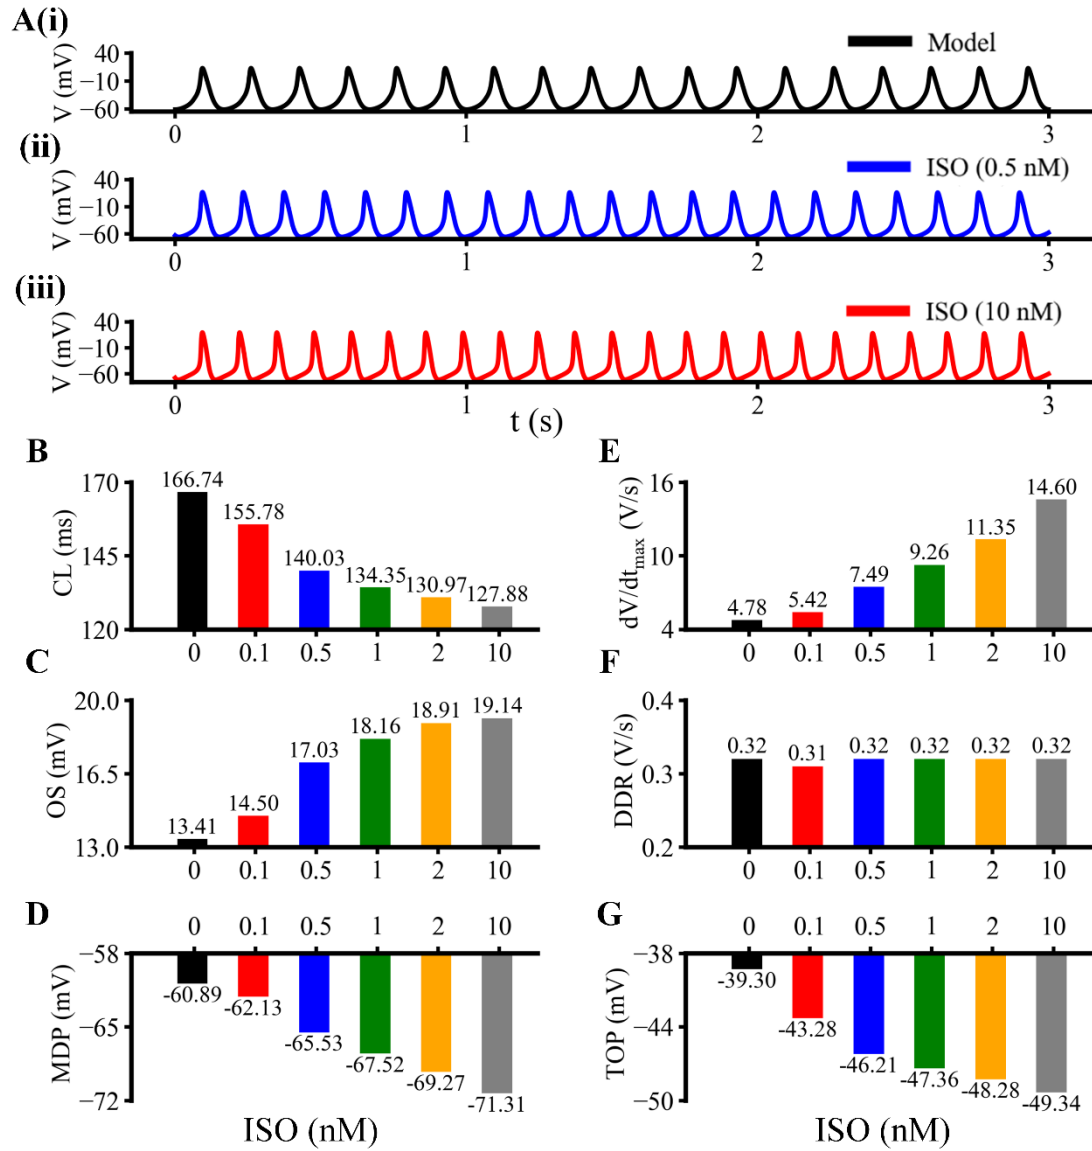

**Figure S7.** Effects of two selected concentrations of ISO on pacemaking and action potential waveform and corresponding biomarkers. (A(i)-A(iii)): APs for control (black), ISO 0.5 nM (blue) and ISO 10 nM (red). (B-G) Summary histograms illustrate the effects of different concentrations of ISO on CL (B), OS (C), MDP (D),  $dV/dt_{max}$  (E), DDR (F) and TOP (G). All abbreviations are the same as those provided in legend of Figure S4.



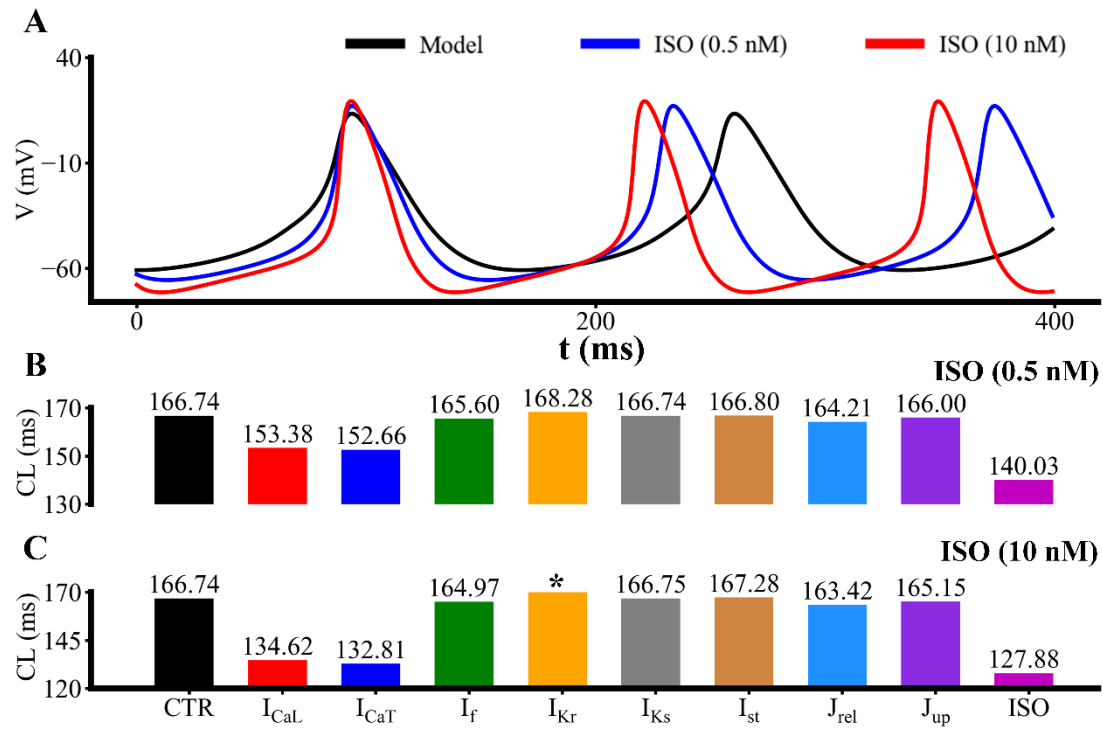

**Figure S8.** Illustrations of ISO-induced changes on individual ion channel parameters or the intracellular  $Ca^{2+}$  handling biomarker during spontaneous pacemaking and APs. A: Spontaneous APs in control, ISO (0.5 nM) and ISO (10 nM) conditions when all ISO-induced changes are integrated illustrated. B: Effects of individually “targeted” actions of ISO (0.5 nM) ( $I_{CaL}$ ,  $I_{CaT}$ ,  $I_f$ ,  $I_{Kr}$ ,  $I_{Ks}$ ,  $I_{st}$ ,  $J_{rel}$  ( $Ca^{2+}$  release flux from the JSR to the subspace),  $J_{up}$  ( $Ca^{2+}$  uptake flux from the myoplasm to the NSR) on CL. C: Effects of individual action of ISO (10 nM) (including  $I_{CaL}$ ,  $I_{CaT}$ ,  $I_f$ ,  $I_{Kr}$ ,  $I_{Ks}$ ,  $I_{st}$ ,  $J_{rel}$  ( $Ca^{2+}$  release flux from the JSR to the subspace),  $J_{up}$  ( $Ca^{2+}$  uptake flux from the myoplasm to the NSR)) on CL.

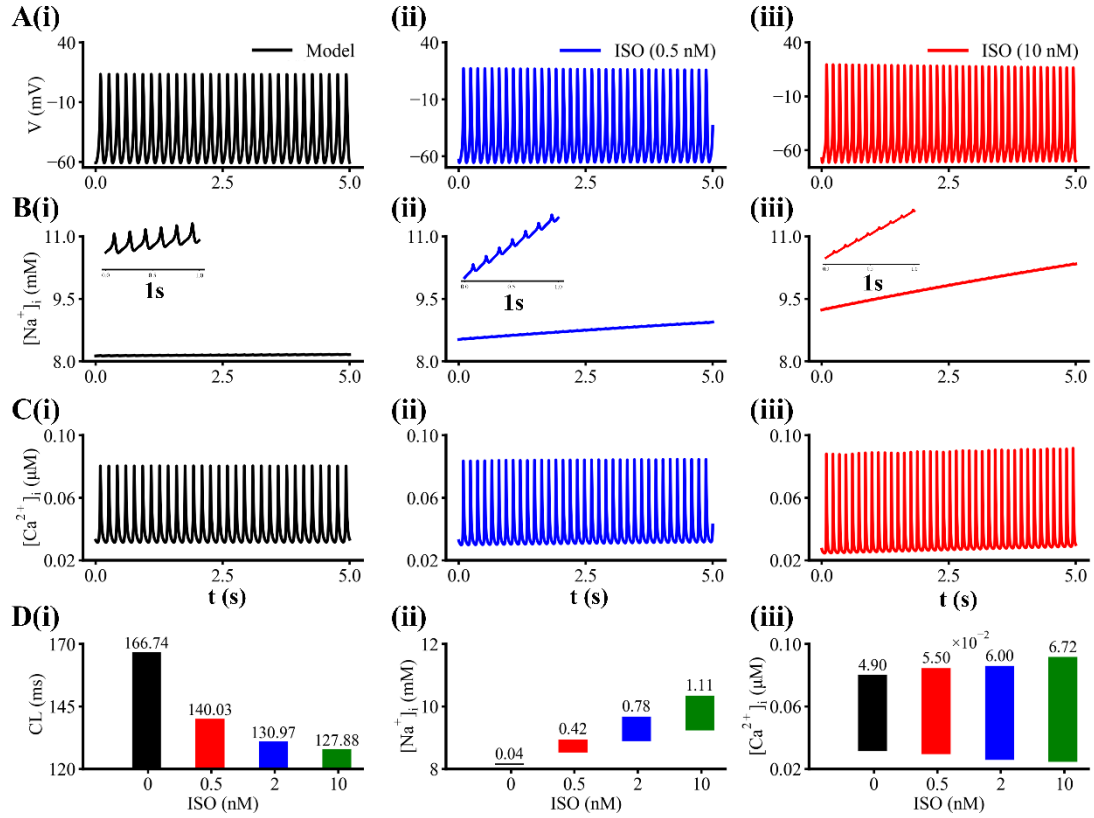

**Figure S9.** Effects of 2 selected ISO concentrations on AP waveforms, pacemaking and intracellular concentrations of Na<sup>+</sup> and Ca<sup>2+</sup>.

A(i)-A(iii): APs at control, and in ISO (0.5 nM) and ISO (10 nM) conditions.

B(i)-B(iii): [Na<sup>+</sup>]<sub>i</sub> at control, ISO (0.5 nM) and ISO (10 nM) conditions. Note that [Na<sup>+</sup>]<sub>i</sub> remains relative stable, though a small drift (increase) seen in the enlarged scale (inset) during the long-term simulation. A similar drifting in [Na<sup>+</sup>]<sub>i</sub> is also seen in ISO conditions. C(i)-C(iii): [Ca<sup>2+</sup>]<sub>i</sub> at control, ISO (0.5 nM) and ISO (10 nM) conditions. Transient changes in [Ca<sup>2+</sup>]<sub>i</sub> arise from a stable diastolic baseline in control but diastolic [Ca<sup>2+</sup>]<sub>i</sub> appears to increase somewhat in ISO conditions.

D(i)-D(iii): Summary histograms illustrating ISO dose-dependence of CL, minimal and maximal range of [Na<sup>+</sup>]<sub>i</sub> and [Ca<sup>2+</sup>]<sub>i</sub> at control, ISO (0.5 nM) and ISO (10 nM) conditions.
